# Supplementary material for: High-performance ZnCo2O4 microsheets as an anode for lithium-ion batteries
Source: Royal Society of Chemistry journal article supplement (doi:10.1039/d1cc03769b), 2021-01-01
Supplement: d1cc03769b1.pdf [file d1cc03769b1.pdf]

## Supporting information

### High-performance ZnCo<sub>2</sub>O<sub>4</sub>microsheets as anode for lithium-ion batteries

Ying Kang<sup>a</sup>, Hongwei Shi<sup>b\*</sup>, Yu-Hang Zhang<sup>a\*</sup>, Fa-Nian Shi<sup>a\*</sup>

*<sup>a</sup>School of Environmental and Chemical Engineering, Shenyang University of Technology,  
Shenyang 110870, China.*

*<sup>b</sup>CAS Key Laboratory of Nuclear Materials and Safety Assessment, Institute of Metal Research,  
Chinese Academy of Sciences, Shenyang 110016, China.*

\*Corresponding authors.

*E-mail addresses:* shifn@sut.edu.cn (F.-N. Shi)

## **Experimental Section**

### **Preparation of Zn-Co-MOFs**

$\text{Co}(\text{CH}_2\text{COO})_2 \cdot 4\text{H}_2\text{O}$  (2 mmol),  $\text{Zn}(\text{CH}_2\text{COO})_2 \cdot 2\text{H}_2\text{O}$  (1 mmol),  $\text{C}_2\text{H}_4\text{O}_2$  (1 mmol) and pyrazole-3,5-dicarboxylic acid hydrate (2 mmol) were dissolved under stirring in 20 g deionized water to attain a turbid purple solution. Next, the solution was put into 100 mL Teflon-lined autoclave and reacted at 200°C for 48 h. After cooling to room temperature, the sample was collected by filtration and drying to obtain the Zn-Co-MOFs.

### **Preparation of $\text{ZnCo}_2\text{O}_4$**

The mesoporous  $\text{ZnCo}_2\text{O}_4$  was obtained by calcining Zn-Co-MOFs. In brief, Zn-Co-MOFs precursor was dispersed in a crucible and then calcined in air at 500 °C, 600 °C and 700 °C for 3 h to generate a black powder, respectively. Finally, the samples obtained were named  $\text{ZnCo}_2\text{O}_4$ -500,  $\text{ZnCo}_2\text{O}_4$ -600 and  $\text{ZnCo}_2\text{O}_4$ -700, respectively.

### **Material characterization**

The morphology and elemental content of obtained samples were observed by scanning electron microscopy (SEM, Phenom proX) with energy dispersive spectrometer (EDS). The microscopic morphology and structure  $\text{ZnCo}_2\text{O}_4$ -600 was determined with transmission electron microscopy (TEM, Bruker Nano GmbH Berlin) and high-resolution electron microscopy (HRTEM). Powder X-ray diffraction (XRD) patterns of obtained samples were collected by a MiniFlex600 diffractometer to analyze the composition of the phase. X-ray photoelectron spectroscopy (XPS) was used to determine the chemical valence states of obtained samples by a scanning X-ray microprobe (Thermo SCIENTIFIC ESCALAB 250Xi). Nitrogen adsorption-desorption isotherms were obtained by an automated volumetric adsorption analyzer (Beijing JWGB Tech., JW-BK122W), and the specific surface area (SSA) was calculated by the Brunauer-Emmett-Teller (BET) method.

### **Electrochemical tests**

The electrochemical performance of  $\text{ZnCo}_2\text{O}_4$  anodes was evaluated by CR2032 half cells. The synthesized sample, conductive carbon black and polyvinylidene

fluoride(PVDF) binder were mixed in NMP solvent at a mass ratio of 7:2:1, and the resulting mixture was magnetized to form a uniform slurry. The slurry was coated on the copper foil and then vacuum dried at 80 °C for 10 h to remove the solvent. The weight of the active material and the geometric area of the electrode used in this study are about 1.4 mg and 1.13 cm<sup>2</sup>, respectively. LiPF<sub>6</sub> dissolved in ethylene carbonate (EC)/dimethyl carbonate (DMC)/diethyl carbonate (DEC) (EC/DMC/DEC 1:1:1 v/v) was used as the electrolyte. Meanwhile, lithium metal and Celgard 2400 film were used as the counter electrode and separator, respectively. A battery testing system (LAND CT2001, Wuhan) was used to test the galvanostatic charge and discharge (GCD) of electrode materials at 0.01-3.0 V. An electrochemical workstation (CHI660E, Shanghai Chenhua) was used to test cyclic voltammetry (CV) curves from 0.01 to 3.00 V with 0.1 mV/s and electrochemical impedance spectroscopy (EIS) in the frequency range from 0.01 Hz to 100 KHz.

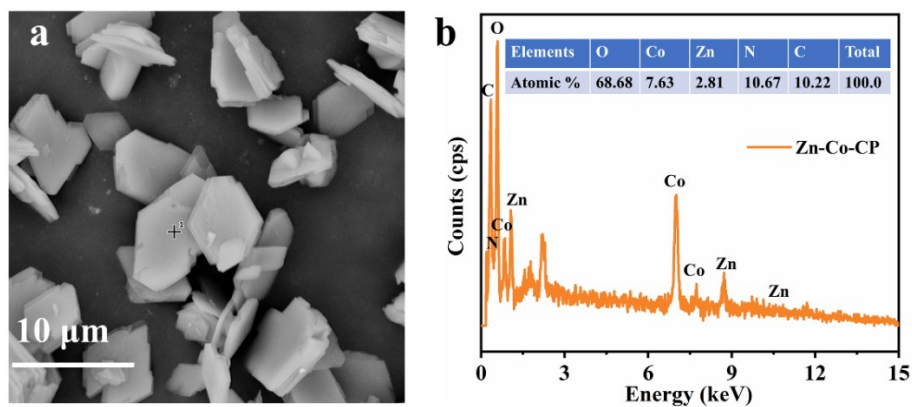

Fig. S1 (a) SEM and (b) EDS images of Zn-Co-MOFs.

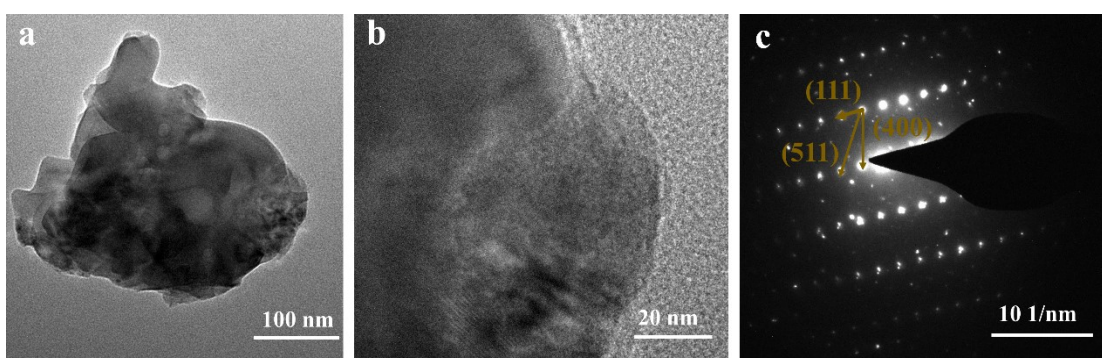

Fig. S2 (a) TEM, (b) HRTEM and (c) SAED patterns of  $\text{ZnCo}_2\text{O}_4$ -600.

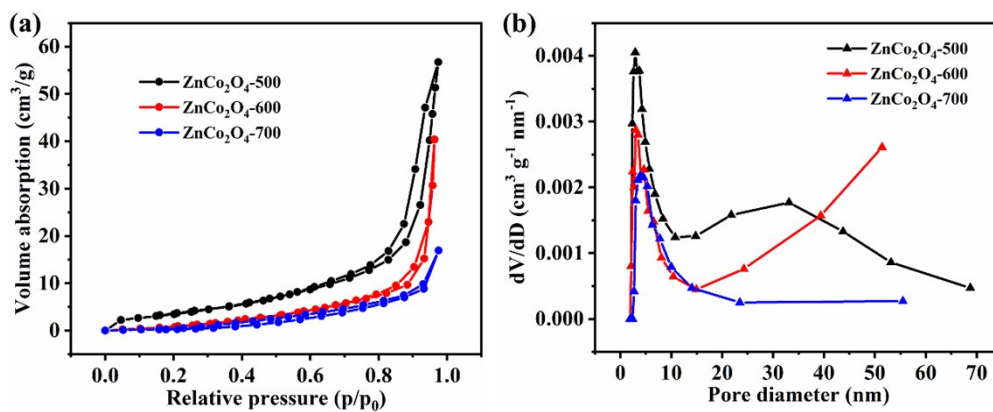

Fig. S3 (a) Nitrogen adsorption-desorption isotherm plots and (b) pore size distribution curves of three samples.

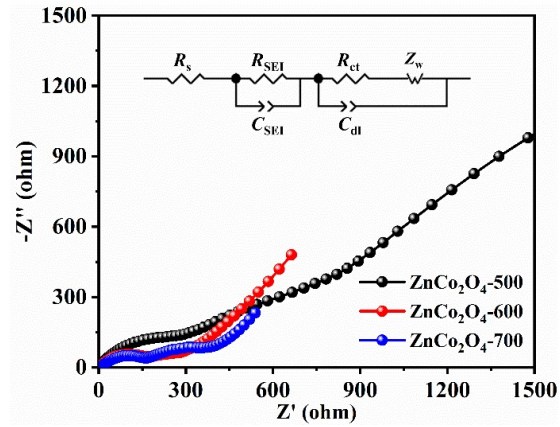

Fig. S4 EIS curves of as-obtained samples after 100 cycles and the equivalent circuit diagram of the cells.

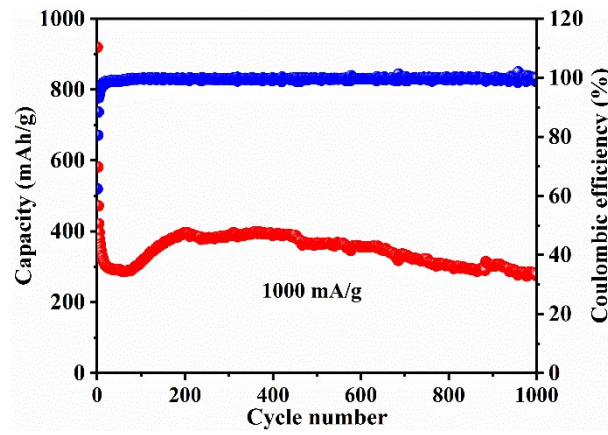

Fig. S5 Cycling performance of ZnCo<sub>2</sub>O<sub>4</sub>-600 at 1000 mA/g.

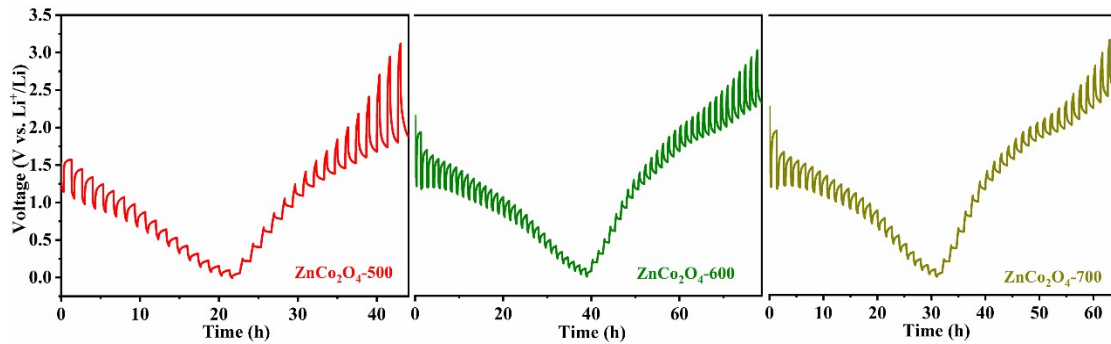

Fig. S6 GITT curves of obtained three electrodes.

Table S1. Comparison of the electrochemical properties of ZnCo<sub>2</sub>O<sub>4</sub> based anodes for LIBs.

| Samples                                                              | Current density (mA/g) | Cycles | Capacity (mAh/g) | Refs.        |
|----------------------------------------------------------------------|------------------------|--------|------------------|--------------|
| 3D ZnCo <sub>2</sub> O <sub>4</sub> nanocubes                        | 500                    | 100    | 775              | S1           |
| ZnCo <sub>2</sub> O <sub>4</sub>                                     | 100                    | 100    | 382              | S2           |
| ZnCo <sub>2</sub> O <sub>4</sub> /Co <sub>3</sub> O <sub>4</sub> /CC | 300                    | 100    | 481.9            | S3           |
| ZnCo <sub>2</sub> O <sub>4</sub> nanosheets                          | 250                    | 500    | 773              | S4           |
| ZnCo <sub>2</sub> O <sub>4</sub> nanospheres                         | 100                    | 50     | 625              | S5           |
| ZnCo <sub>2</sub> O <sub>4</sub> microsheets                         | 100                    | 100    | 816.2            | This<br>work |

#### References

- S1 L. Wang, M. Zhen, F. Hu, H. Wang, H. Jia and M. Wei, *Mater. Lett.*, 2021, **286**, 129231.
- S2 A. Ghaffar, G. Ali, S. Zavar, M. Hasan, G.M. Mustafa, S. Atiq and S.M. Ramay, *RSC Adv.*, 2020, **10**, 28550-28559.
- S3 S. Guo, J. Liu, Q. Zhang and H. Wang, *Mater. Lett.*, 2020, **267**, 127549.
- S4 J. Zhang, R. Chu, Y. Chen, H. Jiang, Y. Zhang, N.M. Huang and H. Guo, *Ceram. Int.*, 2018, **44**, 16219-16226.
- S5 Z. Chen, F. Chen, Y. Wang and Y. Jiang, *Ionics*, 2017, **12**, 1-6.
